# Supplementary material for: Two-year outcomes of the MINIject drainage system for uncontrolled glaucoma from the STAR-I first-in-human trial
Source: PubMed Central journal article supplement — Br J Ophthalmol. 2020 Oct 5;106(1):65–70. doi: 10.1136/bjophthalmol-2020-316888 (PMC8685654; doi:10.1136/bjophthalmol-2020-316888), 2020-10-05
Supplement: bjophthalmol-2020-316888supp001.pdf [file bjophthalmol-2020-316888supp001.pdf]

## Appendix 1

*Questions from the Collaborative Initial Glaucoma Treatment Study (CIGTS) quality of life patient questionnaire used in the STAR-I study*

For each area listed below, patients were asked the following questions:

1. Have you had any problems during the past 7 days?  
Yes  
No
2. If so, is it due to your glaucoma or its treatment?  
Not due  
Partially due  
Entirely due
3. How much does it bother you?  
Not at all  
A little  
Some  
A moderate amount  
A lot

The areas included:

- Eye Irritation/Burning
- Eye Pain
- Excessive Tearing
- Droopy Eyelid
- Red Eye
- Feeling like something is in the eye
- Skin Sensitivity or irritation around the eye
